# Supplementary material for: Evi5 is required for Xenopus limb and tail regeneration
Source: PubMed Central journal article supplement (PMC9809974; doi:10.3389/fcell.2022.1027666), 2022-12-08
Supplement: DataSheet1.pdf [file DataSheet1.pdf]

Supplementary Information

## **Evi5 is required for *Xenopus* limb and tail regeneration**

Li Yang<sup>1,#</sup>, Youwei Chen<sup>1,#</sup>, Huahua Liu<sup>1</sup>, Yu Liu<sup>1</sup>, Feng Yuan<sup>1</sup>, Qianyan Li<sup>1</sup> and Gufa Lin<sup>1,\*</sup>

1Key Laboratory of Spine and Spinal Cord Injury Repair and Regeneration of Ministry of Education, Orthopaedic Department of Tongji Hospital, School of Life Sciences and Technology, Tongji University, Shanghai, China

\*Correspondence: [lingufa@tongji.edu.cn](mailto:lingufa@tongji.edu.cn) (G.L)

# These authors contributed equally to this work.

## Supplementary Figures

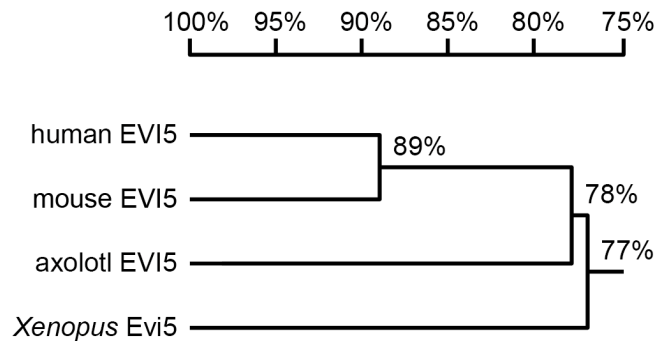

**Figure S1. Sequence comparison of Evi5.** Comparison of human, mouse, axolotl and *Xenopus* Evi5 protein sequence.

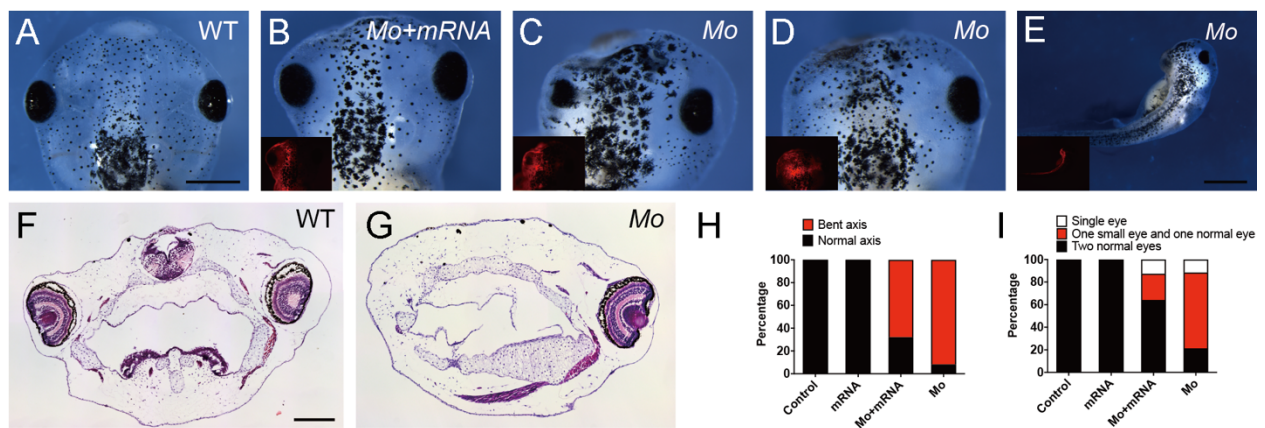

**Figure S2. Effect of *evi5* Mo on embryonic development of *Xenopus*.** (A-E) Knockdown of Evi5 expression during embryonic development, resulting in a smaller eye on the injected side (C) and even an eyeless phenotype (D). Co-injection of *evi5* Mo with *evi5* mRNA partially rescues the abnormal eye development (B). Injection of *evi5* Mo also causes body axis bending (E). (F, G) HE staining of wild-type tadpoles (F) and Mo-injected tadpoles (G). (H, I) Statistics of body axis bending phenotype and small eye phenotype in each injection group. Scale bars represent 1 mm in (E), 500  $\mu$ m in (A-D), and 200  $\mu$ m in (F, G).

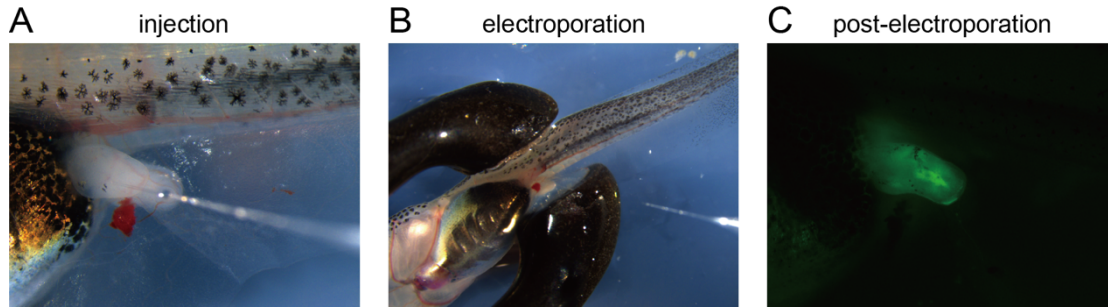

**Figure S3. Injection and electroporation method.** (A) Injection of Mo into the hind limb of NF stage 52 tadpoles using a pulled glass micropipette. (B) Tweezer-style electrodes placed on both sides of the limb for electroporation. (C) Fluorescence detection after electroporation.

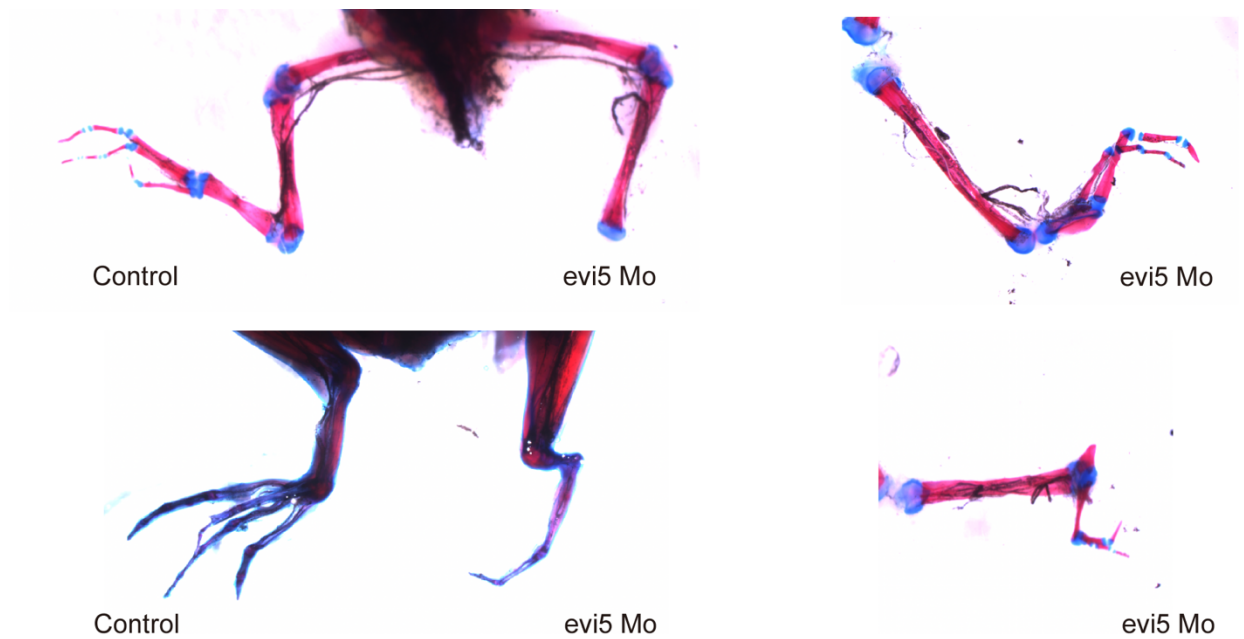

**Figure S4. Skeletal preparation of Evi5 knockdown tadpoles.** Shown are examples of skeletal staining of the hindlimbs of *Xenopus* froglets, 1 month after Evi5 knockdown at NF stage 52/53. While hindlimbs injected and electroporated with Control Mo regenerate 3-4 digits, hindlimbs with Evi5 knockdown regenerate fewer digits, forming 0 to 2 digits. Stage 52/53 tadpole hindlimbs were amputated through the knee level.

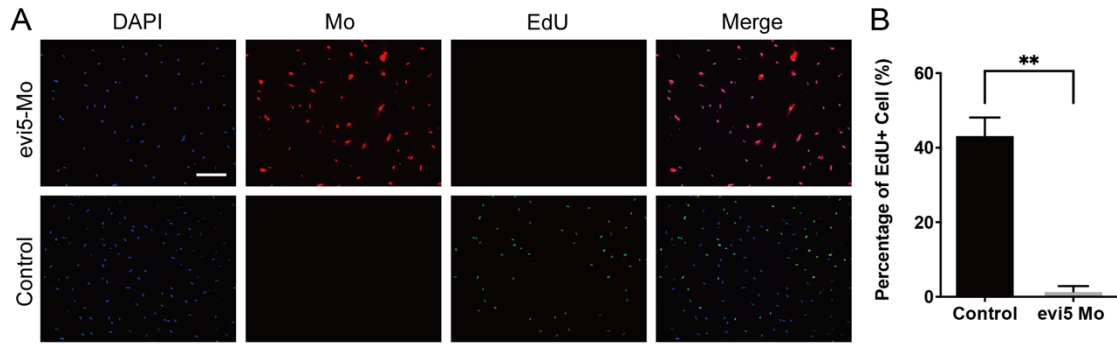

**Figure S5. Proliferation of *Xenopus* tadpole limb blastema cells after *evi5* knockdown.** (A) Micrographs of *Xenopus* blastema cells, after EdU incorporation detection. Mo was indicated by red fluorescence. EdU shown in green. Nuclei were counterstained with DAPI, shown in blue. Scale bar represents 200  $\mu$ m. (B) EdU-positive cells/Mo-transfected cells. \*\* indicates significant difference,  $p < 0.01$ ,  $n = 6$ , t-test.

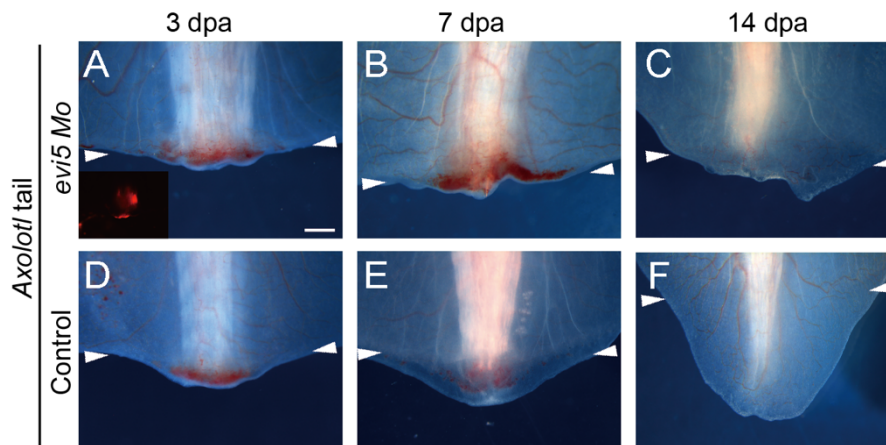

**Figure S6. Axolotl tail regeneration after *Evi5* knockdown.** (A-C) Axolotl tail regeneration was inhibited by *evi5* Mo-injection. (D-F) Axolotl tail regeneration occurred normally in controls. White arrowheads indicate amputation level. Scale bar: 1mm.

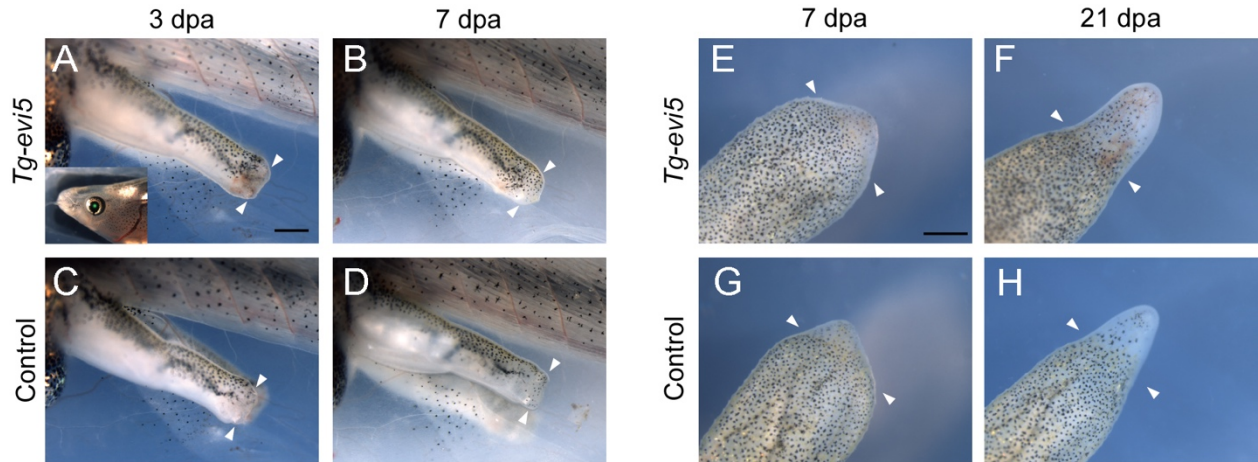

**Figure S7. Overexpression of *evi5* in transgenic tadpoles and post-metamorphic froglets.** (A-D) Continuous induction of *evi5* expression in transgenic tadpoles of NF stage 58 and observation of hind limb regeneration showed that systemic *evi5* overexpression did not promote regeneration. (E-H) Overexpression of *evi5* in post-metamorphic froglets did not facilitate limb regeneration. Scale bar: 500  $\mu\text{m}$ .

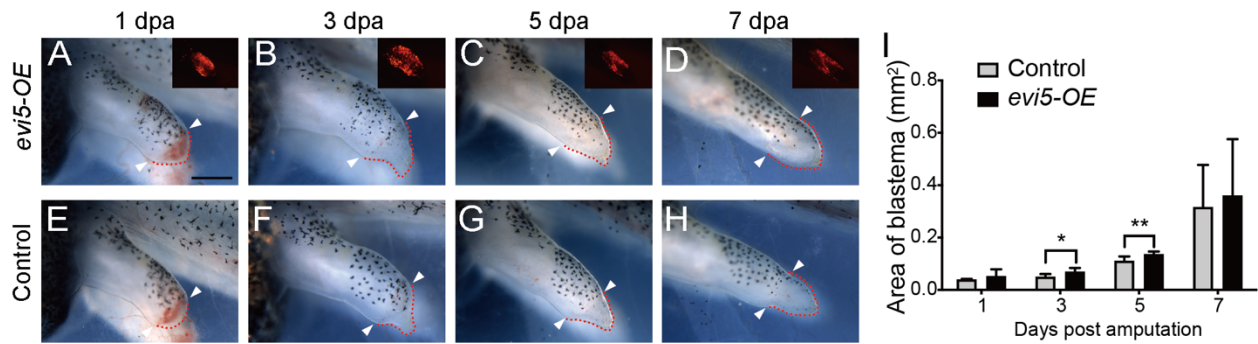

**Figure S8. Overexpression of *evi5* in the hind limbs of NF stage 54-55 tadpoles.** (A-H) Injection of the *evi5*-2A plasmid into the hind limbs of tadpoles at NF stage 54-55 showed that *evi5* overexpression promoted tissue growth but not enough to induce regeneration. (I) The area of the regenerated blastema was measured and analyzed for significance by t-test. Scale bar: 500  $\mu\text{m}$ . \* indicates  $p < 0.05$  and \*\* indicates  $p < 0.01$ .

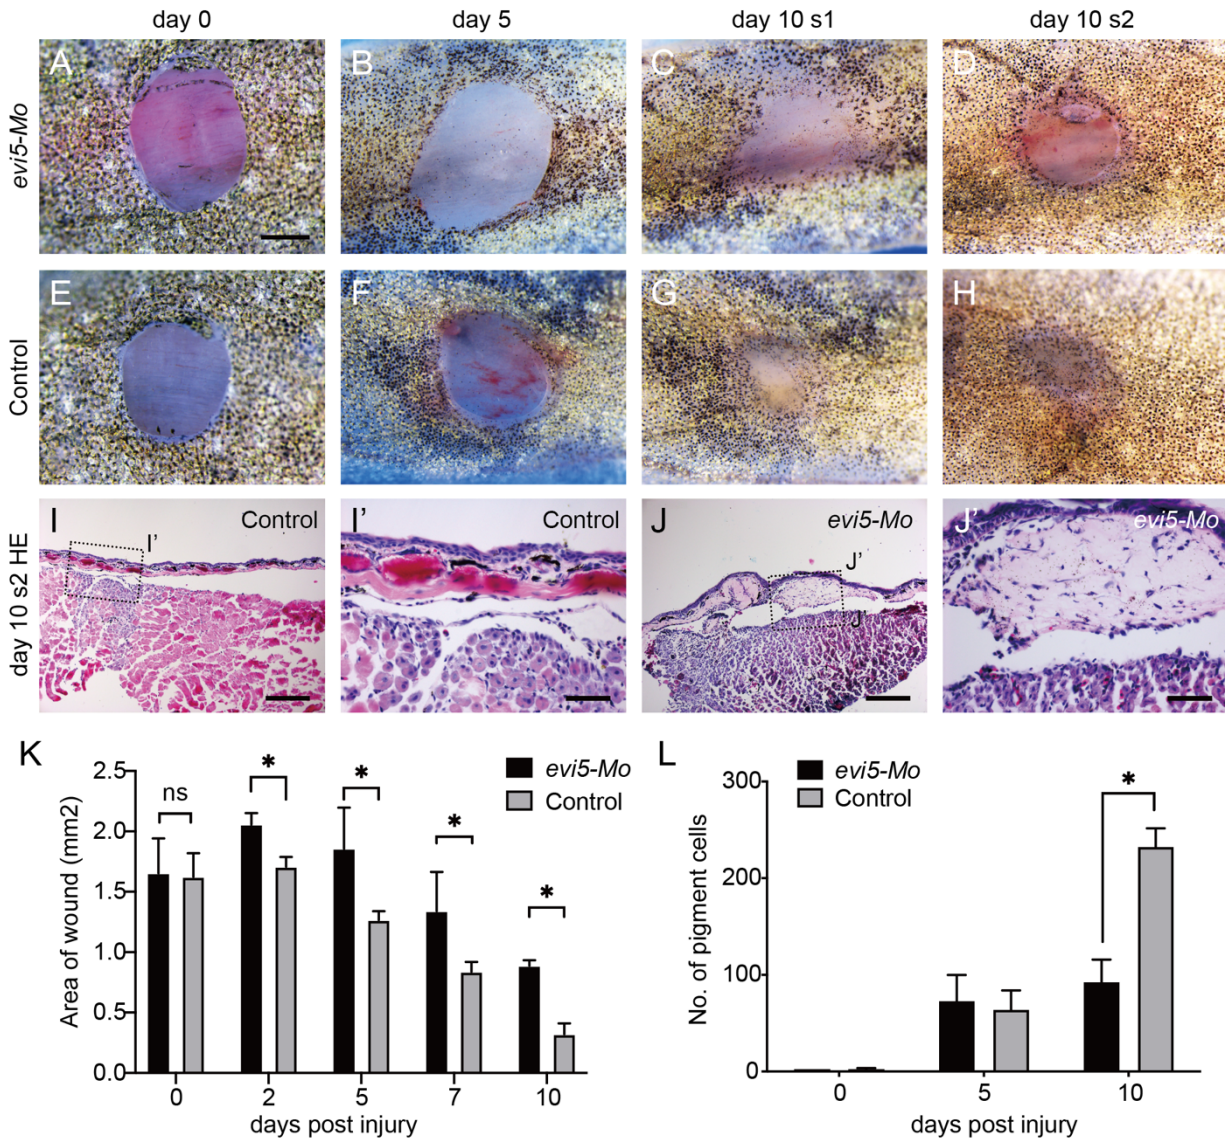

**Figure S9. Effect of *evi5* Mo on wound healing in the *Xenopus* skin punch model. (A-H)** Skin punches performed in the hindlimb of the *Xenopus* froglets. **(I, J)** HE staining of the control and Mo groups at day 10. **(I', J')** Enlargements of the squared areas in **(I)** and **(J)**, respectively. **(K)** Measurement of the area of punch. **(L)** Counting of the number of pigment cells in wounds. Scale bars represent 500  $\mu$ m in **(A-H)**, 200  $\mu$ m in **(I)** and **(J)**, and 50  $\mu$ m in **(I')** and **(J')**. \* indicates  $p < 0.05$ . One-way ANOVA, and multiple between-group t-test. Skin punches were performed with a 1 mm diameter biopsy punch (Acuderm Inc., USA).

## **Supplementary Methods**

### ***Xenopus* limb cell culture and EdU incorporation assay**

*Xenopus* tadpoles were euthanized with an overdose of MS222, and then immersed in 5% bleach for 30 seconds, followed by a thorough rinse with distilled water, to disinfect the skin. Tadpoles were then rinsed with PBS containing antibiotics (1× anti-anti, 100 µg/mL ampicillin, 100 µg/mL gentamicin, Sigma-Aldrich) and transferred to a new clean Petri dish, and the hindlimbs were removed with a clean razor blade and the skin peeled off with a pair of clean forceps. In a tissue culture hood, the blastema and limb stump connective tissues were cut into fine pieces after a brief rinse with culture medium (0.7 × DMEM) containing antibiotics. The tissue pieces were transferred onto a 60 mm tissue culture dish for attachment to a scratched surface, and cultured in 5 mL of *Xenopus* cell culture medium (0.7 × DMEM, 10% FBS), in a 28°C incubator (5% CO<sub>2</sub>). Cells migrating out of the tissue blocks were collected by trypsinization with 0.25% trypsin/EDTA, filtered through a 40 µm cell strainer, pelleted, and then resuspended for passaging. Passages 2-3 of *Xenopus* limb cells were used for electroporation with Mo, followed by EdU incorporation assays.

For EdU incorporation analysis, 10 µM of EdU (5-ethynyl-2'-deoxyuridine, Thermo Fisher Scientific, A10044) was added into the cell culture 24 hours before detection of EdU incorporation by Click-it EdU imaging kit (Thermo Fisher Scientific, C10337) according to the manufacturer's instruction.

### **Alizarin red and Alcian blue skeletal staining**

Tadpoles were euthanized with MS222 and eviscerated, washed briefly with water, and then fixed in 95% ethanol for 12-48 hours. Specimens were stained in 0.03% Alcian blue (Millipore Sigma, St. Louis, USA) until the cartilage was blue. After washing with 95% ethanol, specimens were cleared in a 1% KOH solution and then stained in 0.03% Alizarin solution (Millipore Sigma, St. Louis, USA). The specimens were washed in 1% KOH: 20% glycerol and 1:1 glycerol: 95% ethanol before being imaged.

### **Froglet hindlimb skin punches**

Young adult *Xenopus* (>3 cm snout-vent) were anesthetized in 0.2% MS222. The dorsal skin of the hindlegs was punched with a 1 mm diameter biopsy punch (Acuderm Inc., USA). Punch depth was determined empirically to minimize the damage to the hindlimb muscles.
